# Supplementary material for: Microcontact printing of polyelectrolytes on PEG using an unmodified PDMS stamp for micropatterning nanoparticles, DNA, proteins and cells
Source: Royal Society of Chemistry journal article supplement (doi:10.1039/c2sm25835h), 2012-01-01
Supplement: c2sm25835h.pdf [file c2sm25835h.pdf]

## Electronic Supplementary Information

Microcontact Printing of Polyelectrolytes on PEG Using Unmodified PDMS Stamp for  
Micropatterning Nanoparticles, DNA, Proteins and Cells

Zhibin Wang, Peipei Zhang, Brett Kirkland, Yingru Liu, Jingjiao Guan\*

Department of Chemical and Biomedical Engineering  
FAMU-FSU College of Engineering  
Integrative NanoScience Institute  
Florida State University  
2525 Pottsdamer Street  
Tallahassee, Florida, 32310, USA

\* Corresponding author  
Tel: +1 850 410-6643  
Fax: +1 850 410-6150  
E-mail: [guan@eng.fsu.edu](mailto:guan@eng.fsu.edu)

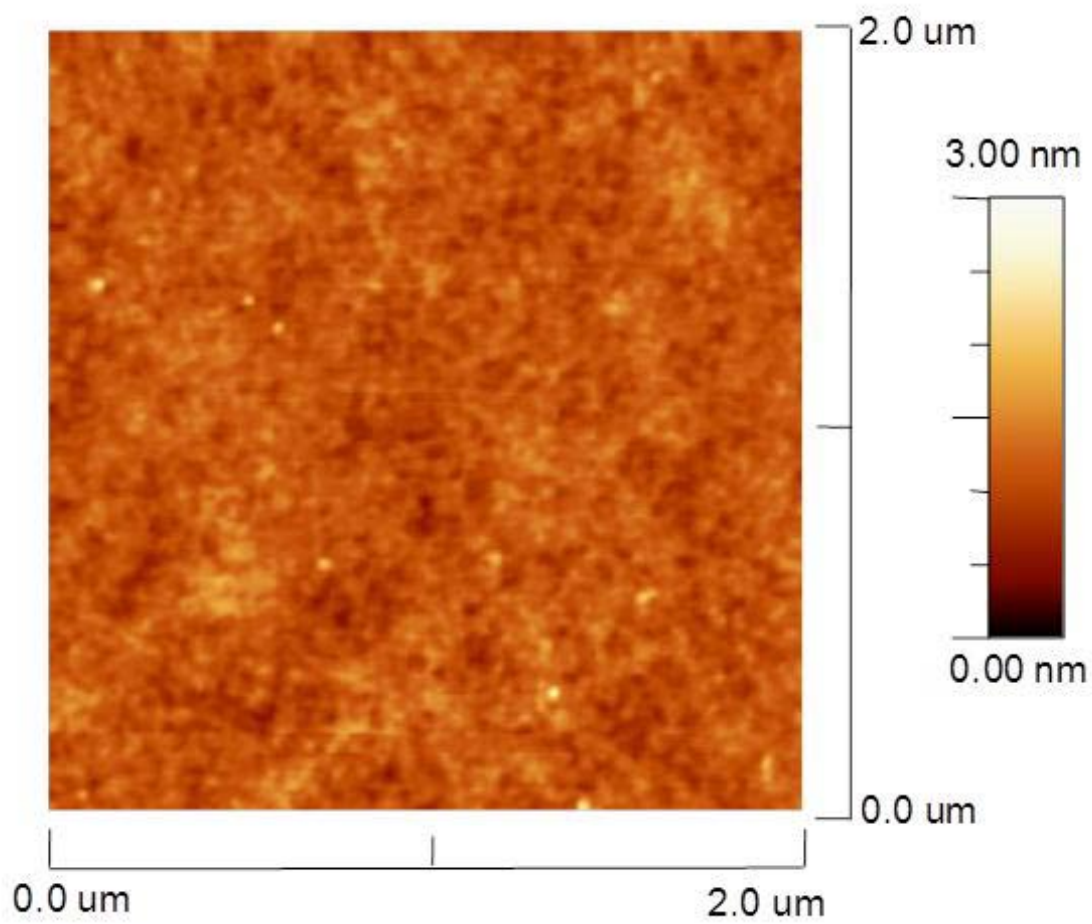

**Fig. S1.** AFM image of a PEG-silane SAM on glass.

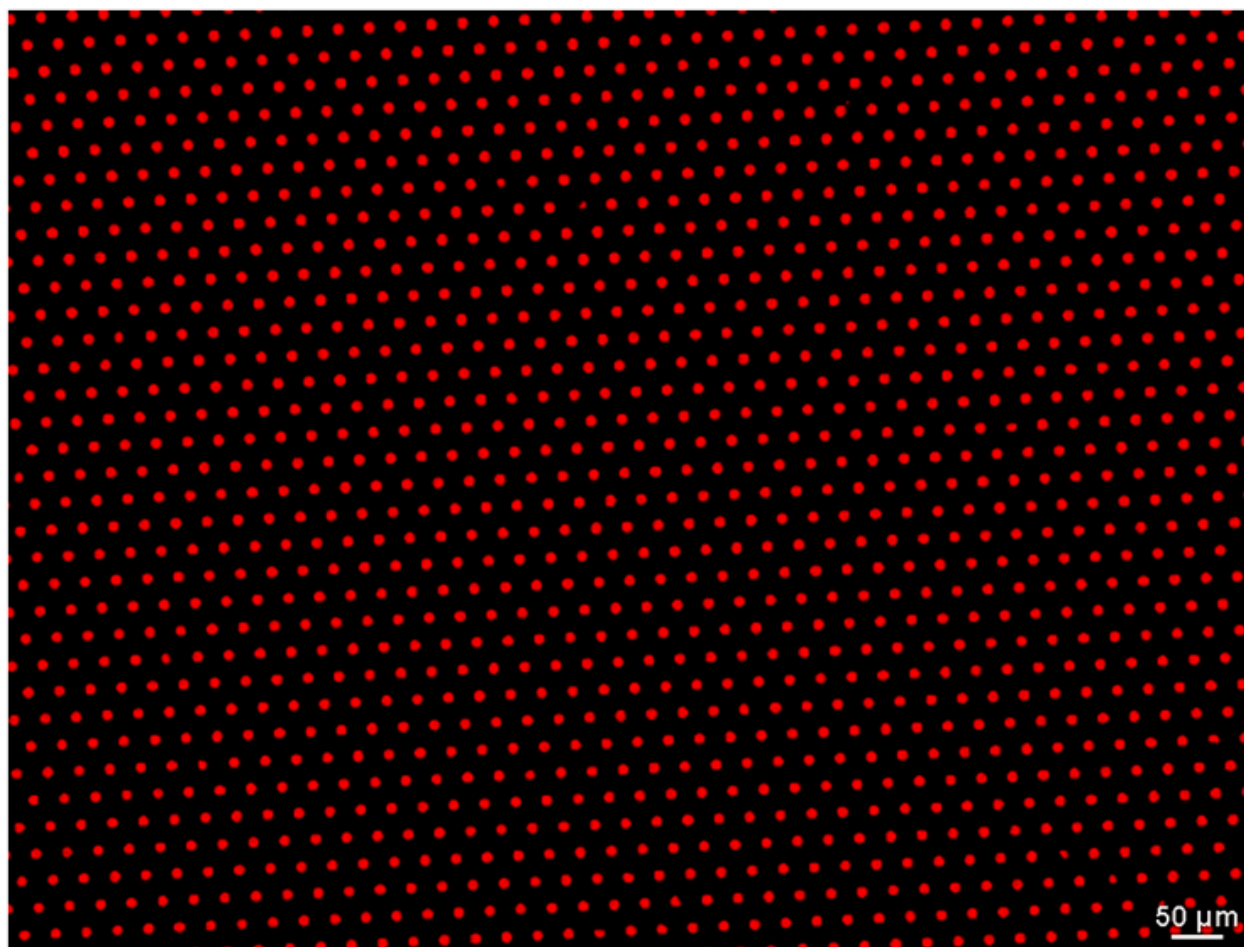

**Fig. S2.** Fluorescence micrograph of an array of PAH-RITC dots printed on a PEG-silane SAM on glass over a large area.
